# Supplementary material for: Hippocampal sharp wave-ripples and the associated sequence replay emerge from structured synaptic interactions in a network model of area CA3
Source: eLife journal article supplement (doi:10.7554/elife.71850), 2022-01-18
Supplement: supp [file elife-71850-supp-v1.zip]

Archive with 6 entries (6 files):
- elife_poa_e71850_Transparent_Reporting_File.docx
- elife_poa_e71850_Figure_1_figure_supplement_1.pdf
- elife_poa_e71850_Figure_1_figure_supplement_2.pdf
- elife_poa_e71850_Figure_2_figure_supplement_1.pdf
- elife_poa_e71850_Figure_2_figure_supplement_2.pdf
- elife_poa_e71850_Figure_3_figure_supplement_1.pdf
