# Supplementary figures and images for: Hippocampal sharp wave-ripples and the associated sequence replay emerge from structured synaptic interactions in a network model of area CA3
Source: eLife journal article supplement (doi:10.7554/elife.71850), 2022-01-18

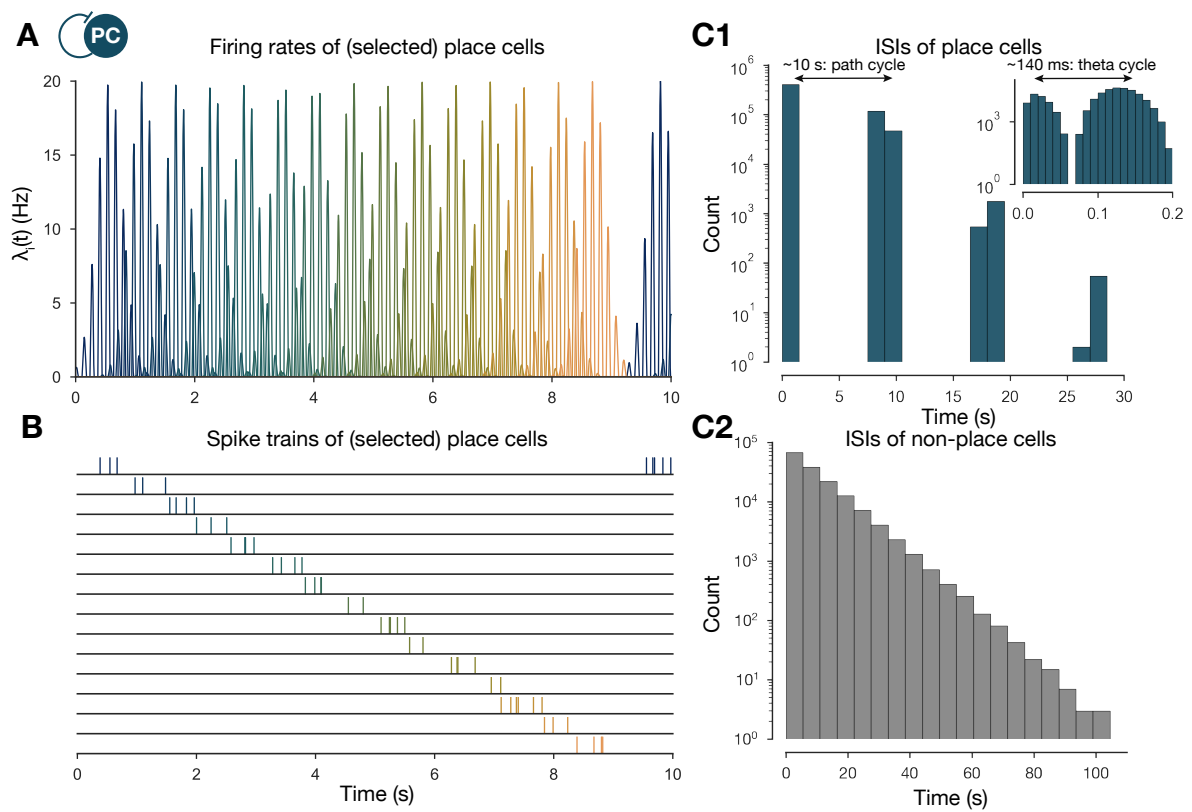

**Figure 1-Figure supplement 1 - Ecker et al.**

Supplement: supp [file elife-71850-supp-v1.zip › elife_poa_e71850_Figure_1_figure_supplement_1.pdf]

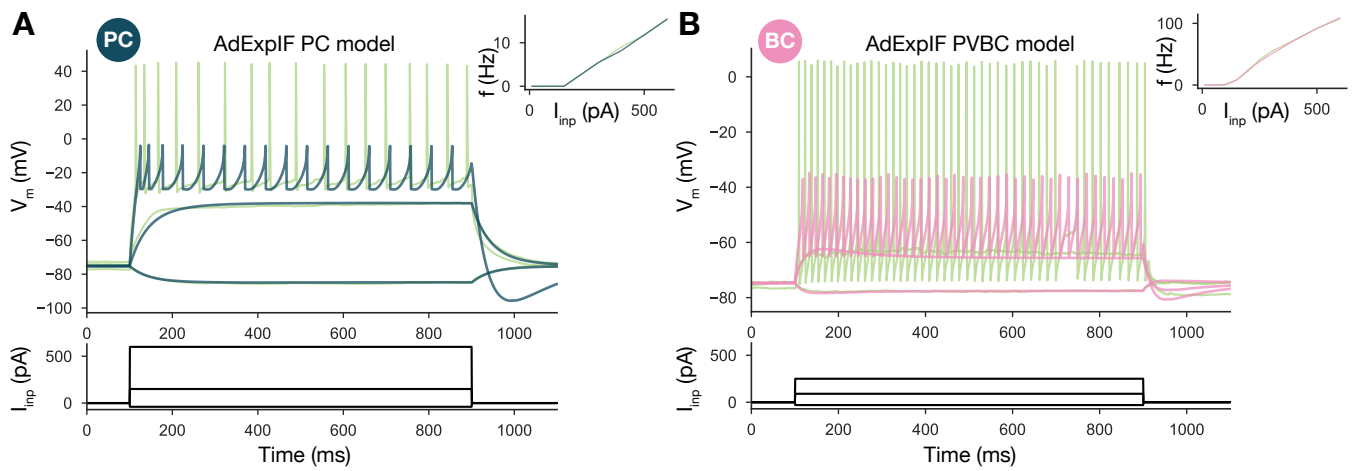

**Figure 1-Figure supplement 2 - Ecker et al.**

Supplement: supp [file elife-71850-supp-v1.zip › elife_poa_e71850_Figure_1_figure_supplement_2.pdf]

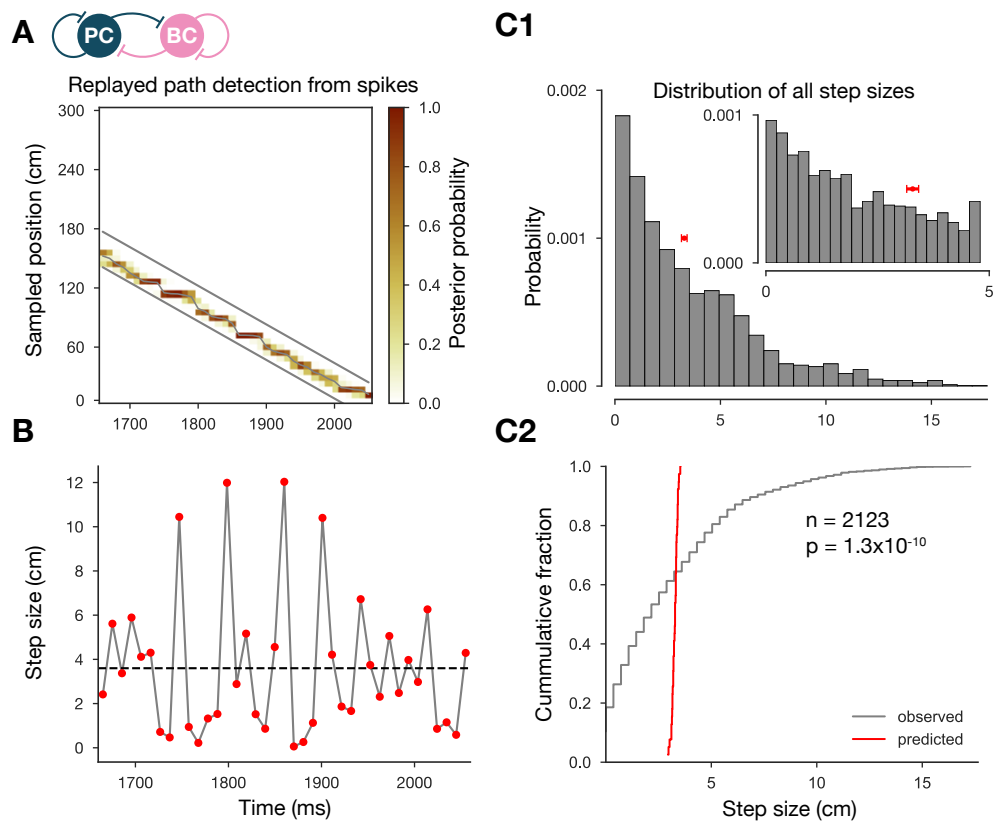

**Figure 2-Figure supplement 1 - Ecker et al.**

Supplement: supp [file elife-71850-supp-v1.zip › elife_poa_e71850_Figure_2_figure_supplement_1.pdf]

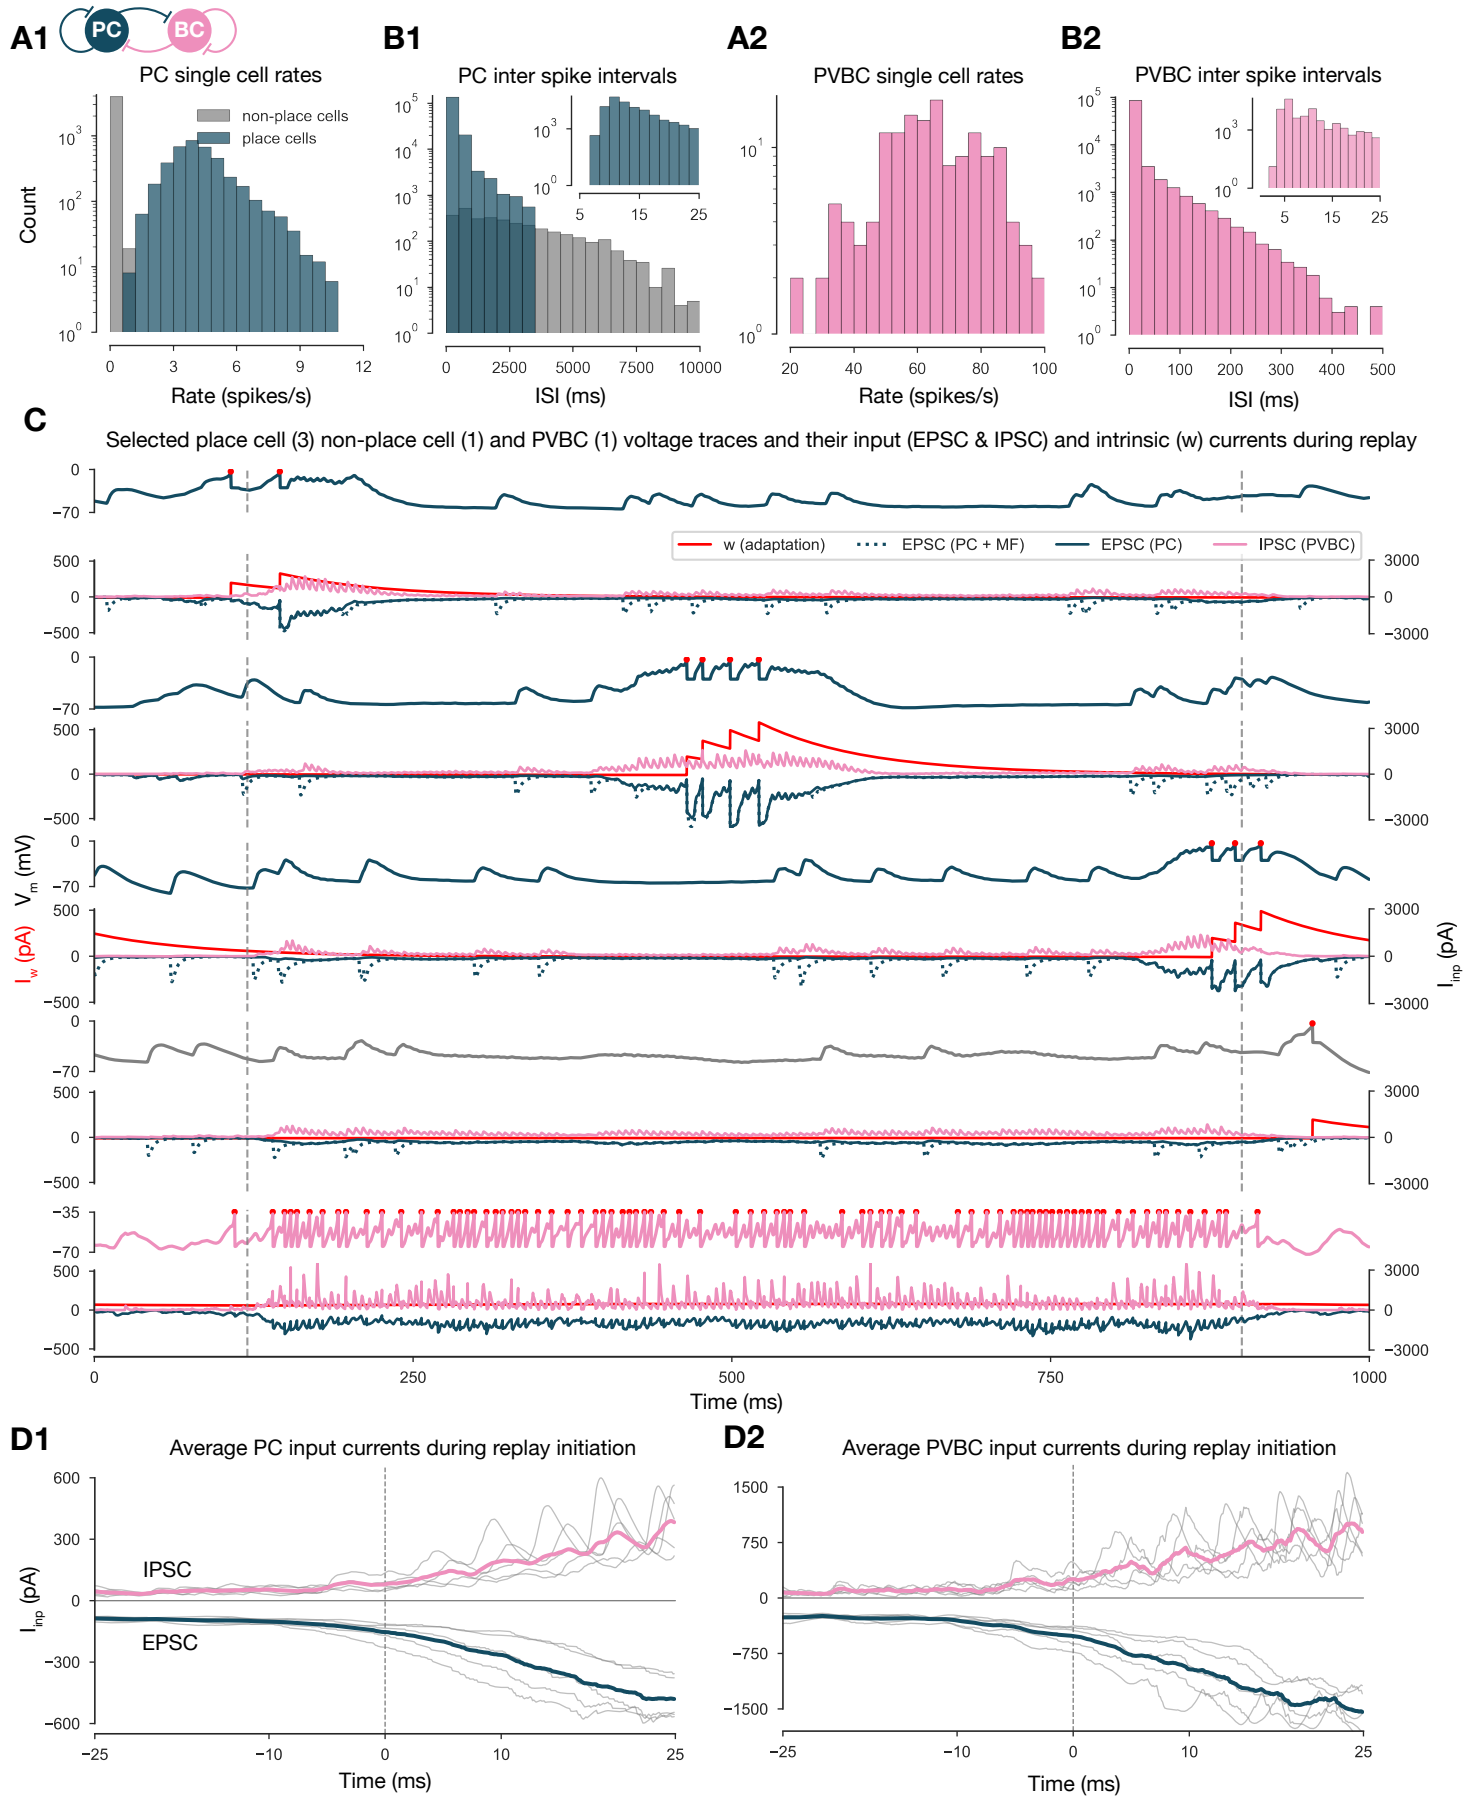

**Figure 2-Figure supplement 2 - Ecker et al.**

Supplement: supp [file elife-71850-supp-v1.zip › elife_poa_e71850_Figure_2_figure_supplement_2.pdf]

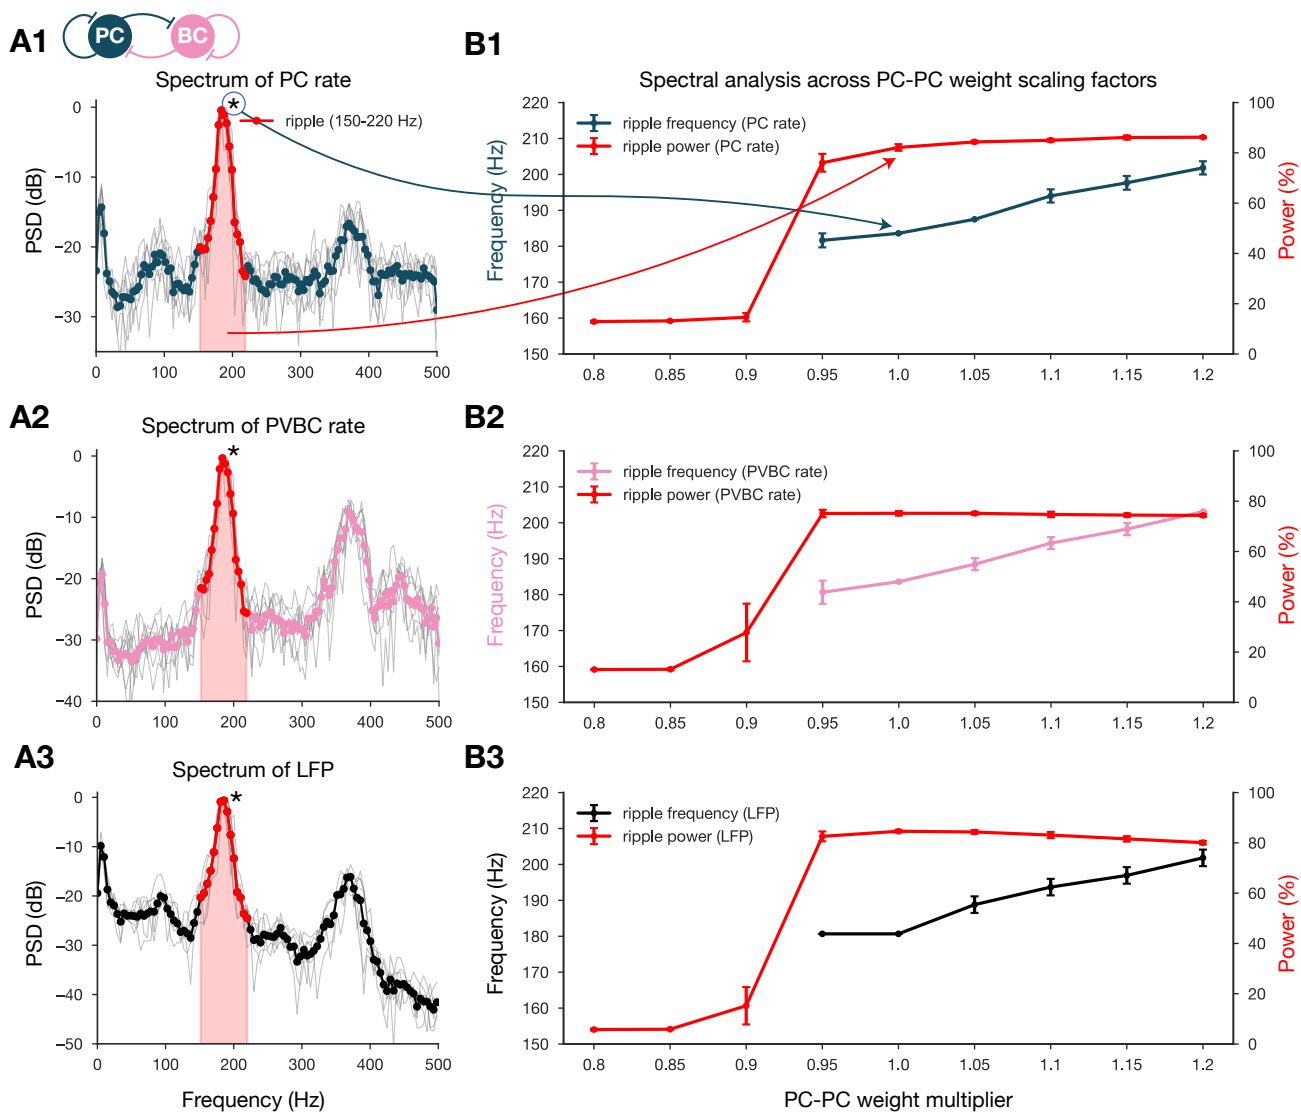

**Figure 3-Figure supplement 1 - Ecker et al.**

Supplement: supp [file elife-71850-supp-v1.zip › elife_poa_e71850_Figure_3_figure_supplement_1.pdf]
